# Supplementary material for: Inhibition of MELK produces potential anti‐tumour effects in bladder cancer by inducing G1/S cell cycle arrest via the ATM/CHK2/p53 pathway
Source: PubMed Central journal article supplement (PMC6991658; doi:10.1111/jcmm.14878), 2019-12-10
Supplement: JCMM-24-1804-s001.pdf [file JCMM-24-1804-s001.pdf]

# Supplementary Information 1

## Supplementary Figures

**A**

Cox analyses of overall survival among 165 bladder cancer patients

| Bladder cancer patients (n = 165) | Univariate analysis |              |         | Multivariate analysis |              |         |
|-----------------------------------|---------------------|--------------|---------|-----------------------|--------------|---------|
|                                   | HR                  | 95% CI       | p value | HR                    | 95% CI       | p value |
| MELK expression (low/high)        | 1.762               | 1.092-2.842  | 0.020   | 1.384                 | 1.021-1.895  | 0.038   |
| Gender (female/male)              | 0.631               | 0.356-1.120  | 0.116   | -                     | -            | -       |
| Age                               | 1.069               | 1.044-1.095  | <0.001  | 1.086                 | 1.056-1.117  | <0.001  |
| T Stage                           | 2.017               | 1.609-2.527  | <0.001  | 1.057                 | 0.762-2.158  | 0.176   |
| N Stage (N1-N3 vs. N0)            | 7.701               | 4.011-14.788 | <0.001  | 2.440                 | 1.077-5.528  | 0.033   |
| M Stage (M1 vs. M0)               | 9.898               | 4.378-22.378 | <0.001  | 5.200                 | 1.803-14.997 | 0.002   |
| Grade (low/high)                  | 2.695               | 1.670-4.347  | <0.001  | 0.892                 | 0.488-1.629  | 0.710   |
| Recurrence (no/yes)               | 1.417               | 0.725-2.771  | 0.308   | -                     | -            | -       |
| Progression (no/yes)              | 2.927               | 1.779-4.815  | <0.001  | 3.250                 | 1.846-5.723  | <0.001  |

**B**

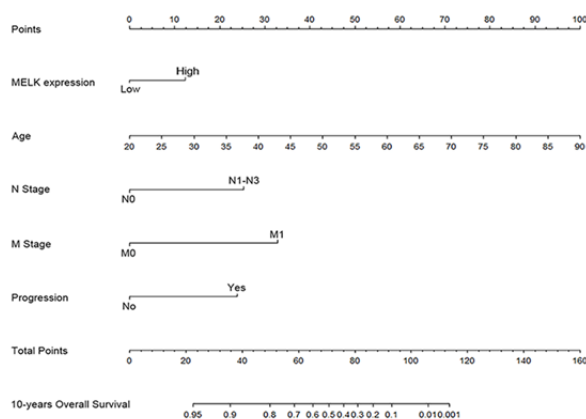

**C**

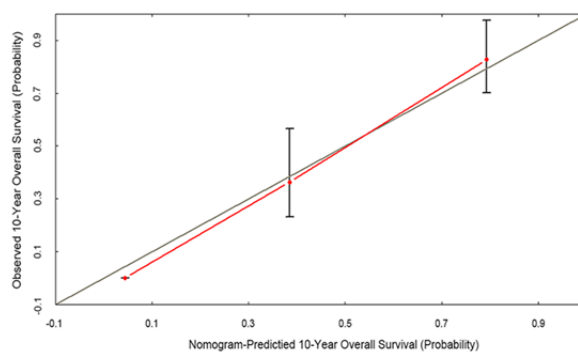

**Supplementary Figure S1. MELK was associated with poor overall survival. (A)** Cox analyses of overall survival among 165 bladder cancer patients. **(B)** The nomogram for 10-year overall survival prediction of BCa patients. **(C)** The calibration curves developed for 10-year overall survival prediction nomogram.

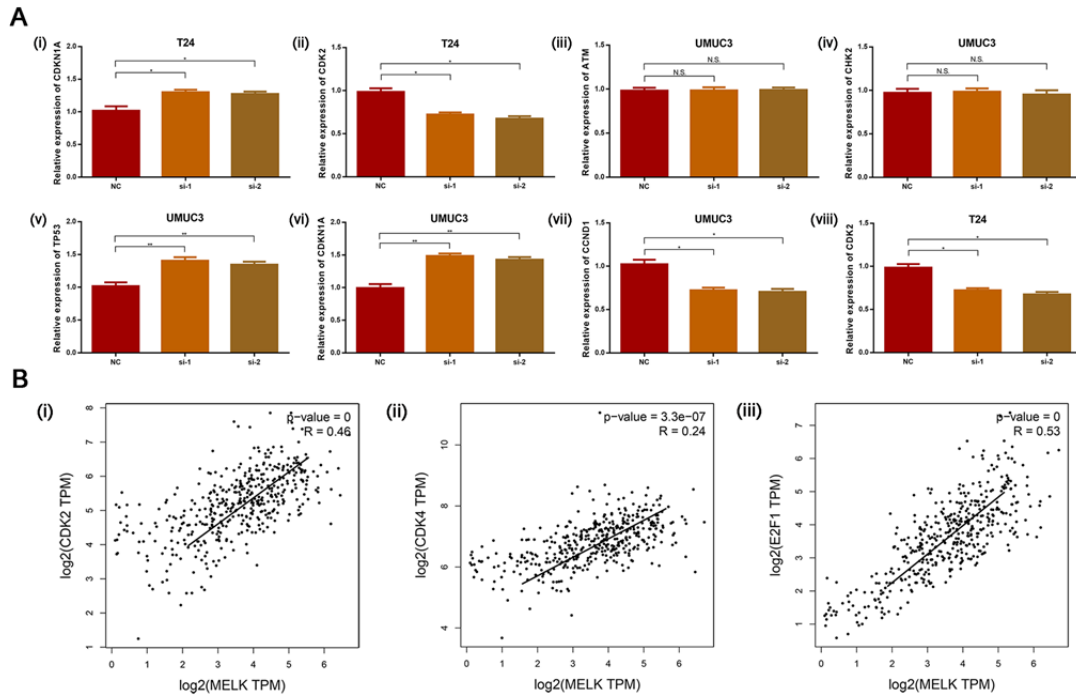

**Supplementary Figure S2. The correlation between MELK and G1/S phase cell cycle-related genes as well as ATM/CHK2/p53 pathway-related genes. (A)** The correlation between MELK and G1/S phase cell cycle-related genes as well as ATM/CHK2/p53 pathway-related genes in transfected BCa cells was investigated with qRT-PCR analysis. **(B)** The linear relationship between MELK and G1/S phase cell cycle-related genes in GEPIA database, \*  $p < 0.05$ ; \*\*  $p < 0.01$ .

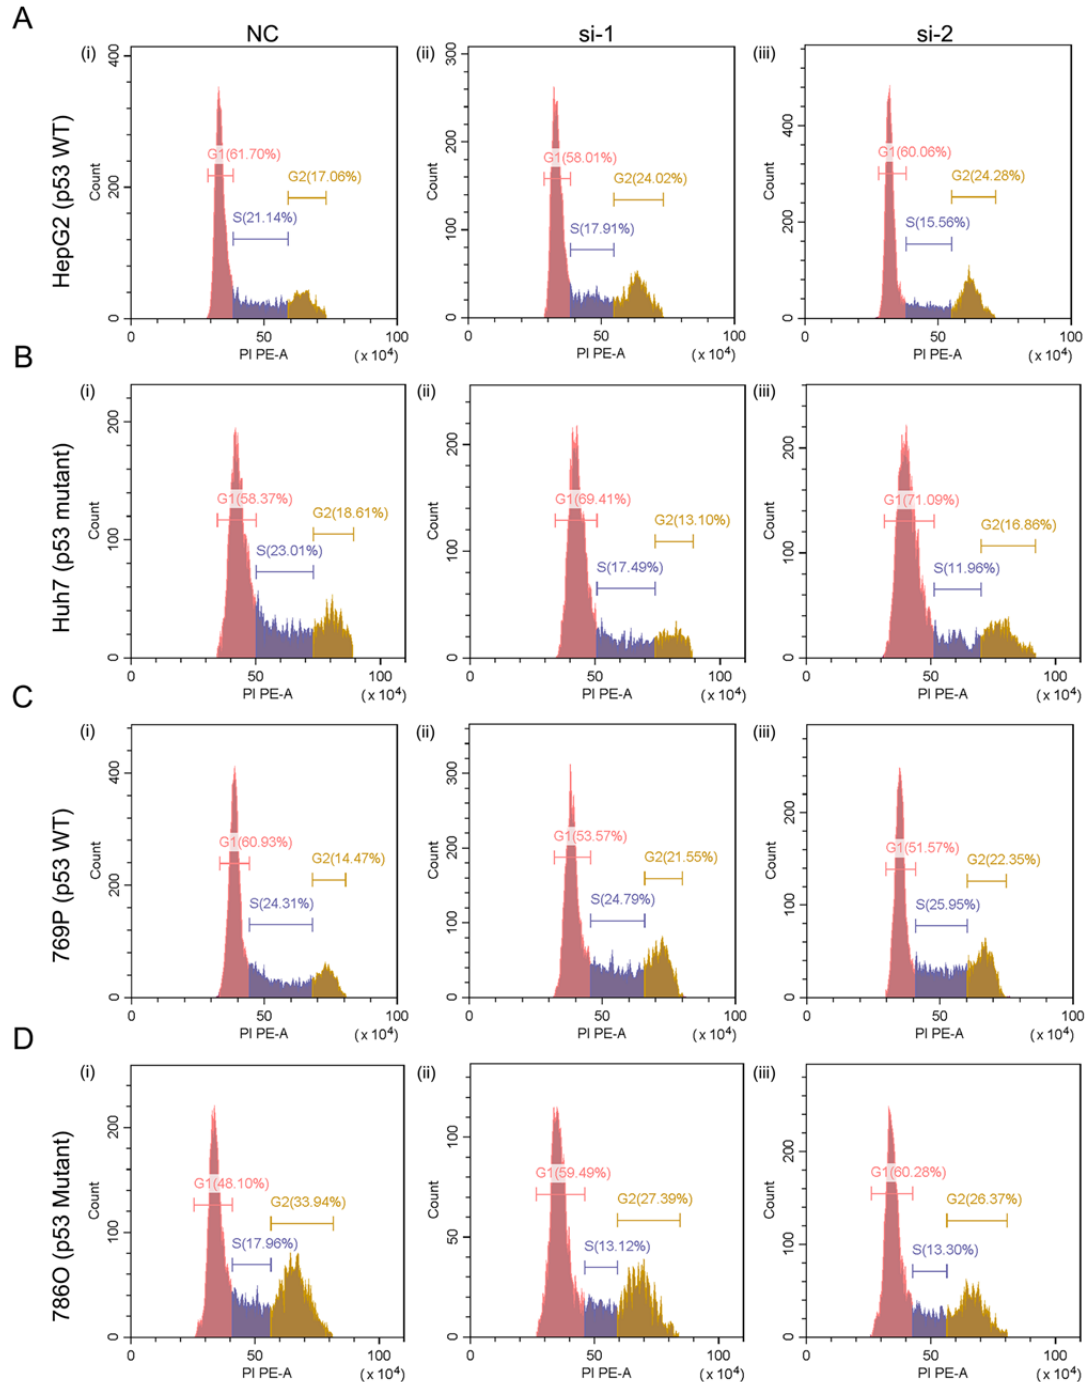

**Supplementary Figure S3. MELK silencing induced different cell cycle arrest in different cancer cells. (A)** MELK silencing in HepG2 cells (p53 wild type liver cancer cell line) induced cell cycle arrest at G2/M phase. **(B)** MELK silencing in Huh7 cells (p53 mutant liver cancer cell line) induced cell cycle arrest at G1/S phase. **(C)** MELK silencing in 769P cells (p53 wild type kidney cancer cell line) induced cell cycle arrest at G2/M phase. **(D)** MELK silencing in 786O cells (p53 mutant kidney cancer cell line) induced cell cycle arrest at G1/S phase.

## Supplementary Information 2

### Supplementary Tables

#### Supplementary Table S1. List of primers for qRT-PCR.

| Gene name                                | Symbol        | Forward primer              | Reverse primer              | Annealing Temperature (°C) | Length (bp) |
|------------------------------------------|---------------|-----------------------------|-----------------------------|----------------------------|-------------|
| Ataxia telangiectasia mutated            | <i>ATM</i>    | ATCTGCTGCCGTCAA<br>CTAGAA   | GATCTCGAATCAG<br>GCGCTTAAA  | 57                         | 82          |
| Cyclin D1                                | <i>CCND1</i>  | GCTGCGAAGTGGA<br>ACCATC     | CCTCCTTCTGCACA<br>CATTGAA   | 56                         | 135         |
| Cyclin dependent kinase 2                | <i>CDK2</i>   | CCAGGAGTTACTTCT<br>ATGCCTGA | TTCATCCAGGGGA<br>GGTACAAC   | 56                         | 90          |
| Cyclin dependent kinase inhibitor 1A     | <i>CDKN1A</i> | TGTCCGTCAGAACCC<br>ATGC     | AAAGTCGAAGTTC<br>CATCGCTC   | 58                         | 139         |
| Checkpoint kinase 2                      | <i>CHK2</i>   | TGAGAACCTTATGTG<br>GAACCCC  | ACAGCACGGTTAT<br>ACCCAGC    | 58                         | 82          |
| Glyceraldehyde-3-phosphate dehydrogenase | <i>GAPDH</i>  | GAAGGTGAAGGTCG<br>GAGTC     | GAAGATGGTGATG<br>GGATTTC    | 56                         | 197         |
| Maternal embryonic leucine zipper kinase | <i>MELK</i>   | TCTCCCAGTAGCATT<br>CTGCTT   | TGATCCAGGGATG<br>GTTCAATAGA | 56                         | 94          |
| Tumor protein p53                        | <i>TP53</i>   | CAGCACATGACGGA<br>GGTTGT    | TCATCCAAATACTC<br>CACACGC   | 58                         | 125         |

**Supplementary Table S2. List of primary antibodies.**

| Antigens                   | Species antibodies raised in | Dilution (IF) | Dilution (WB) | Dilution (IHC) | Supplier                                            |
|----------------------------|------------------------------|---------------|---------------|----------------|-----------------------------------------------------|
| CDK2, human                | Rabbit, monoclonal           | 1:200         | 1:2,000       | -              | Abcam, UK, Cat. #ab32147                            |
| Cyclin D1, human           | Rabbit, monoclonal           | -             | 1:2,000       | -              | Cell Signaling Technology, USA, Cat. #2978          |
| GAPDH, human               | Mouse, monoclonal            | -             | 1:2,000       | -              | Santa Cruz Biotechnology Inc., USA, Cat. #sc-365062 |
| Ki-67, human               | Rabbit, monoclonal           | 1:200         | 2 $\mu$ g/ml  | -              | Novus Biologicals, USA, Cat. #NBP2-19012            |
| MDMX, human                | Rabbit, monoclonal           | -             | 1:500         | -              | Proteintech, China, Cat. #17914-1                   |
| MELK, human                | Rabbit, monoclonal           | 1:100         | 1:500         | 1:100          | Proteintech, China, Cat. #11403-1                   |
| p21, human                 | Rabbit, monoclonal           | 1:100         | 1:1,000       | -              | Abcam, UK, Cat. #ab109520                           |
| p53, human                 | Rabbit, monoclonal           | 1:200         | 1:1,000       | -              | Abcam, UK, Cat. #ab183544                           |
| E2F1, human                | Rabbit, monoclonal           | -             | 1:2,000       | -              | Abcam, UK, Cat. #ab179445                           |
| E-Cadherin, human          | Rabbit, monoclonal           | -             | 1:2,000       | -              | Abcam, UK, Cat. #ab76055                            |
| N-Cadherin, human          | Rabbit, monoclonal           | -             | 1:2,000       | -              | Abcam, UK, Cat. #ab76011                            |
| ATM, human                 | Rabbit, monoclonal           | -             | 1:1,000       | -              | Abcam, UK, Cat. #ab32420                            |
| Chk2, human                | Rabbit, monoclonal           | -             | 1:5,000       | -              | Abcam, UK, Cat. #ab109413                           |
| ATM (phospho S1981), human | Rabbit, monoclonal           | 1:500         | 1:2,000       | -              | Abcam, UK, Cat. #ab81292                            |
| Chk2 (phospho T68), human  | Rabbit, monoclonal           | -             | 1:2,000       | -              | Abcam, UK, Cat. #ab32148                            |

**Supplementary Table S3. List of secondary antibodies and counterstaining of nuclei.**

| <b>Secondary detection system used</b>                                           | <b>Host</b> | <b>Method</b> | <b>Dilution</b> | <b>Supplier</b>                                   |
|----------------------------------------------------------------------------------|-------------|---------------|-----------------|---------------------------------------------------|
| Anti-Mouse-IgG (H+L)-HRP                                                         | Goat        | WB            | 1:10,000        | Sungene Biotech, China, Cat. #LK2003              |
| Anti-Rabbit-IgG (H+L)-HRP                                                        | Goat        | WB            | 1:10,000        | Sungene Biotech, China, Cat. #LK2001              |
| Anti-rabbit IgG (H+L), F(ab') <sub>2</sub> Fragment (Alexa Fluor® 488 Conjugate) | Goat        | WB            | 1:50            | Cell Signaling Technology, USA, Cat. #4412        |
| Anti-mouse IgG (H+L), F(ab') <sub>2</sub> Fragment (Alexa Fluor® 555 Conjugate)  | Goat        | WB            | 1:50            | Cell Signaling Technology, USA, Cat. #4408        |
| Anti-goat IgG-FITC                                                               | Rabbit      | IF            | 1:100           | Boster Biological Technology, China, Cat. #BA1110 |
| Anti-goat IgG-Cy3                                                                | Rabbit      | IF            | 1:100           | Boster Biological Technology, China, Cat. #BA1034 |
| Hoechst 33342 nucleic acid staining (DAPI)                                       | -           | IF            | 1:750           | Molecular Probes/Invitrogen, USA, Cat. #A11007    |

**Supplementary Table S4. The clinicopathological information of 31 bladder cancer patients.**

| <b>Patient number</b> | <b>Gender</b> | <b>Age</b> | <b>Tumor stage</b> | <b>Tumor Grade</b> | <b>Lymphnodes status</b> | <b>Infiltration</b> |
|-----------------------|---------------|------------|--------------------|--------------------|--------------------------|---------------------|
| 1                     | Male          | 63         | T2                 | G1                 | -                        | MIBC                |
| 2                     | Male          | 48         | T3                 | G3                 | -                        | MIBC                |
| 3                     | Male          | 74         | T4                 | G3                 | +                        | MIBC                |
| 4                     | Female        | 59         | T3                 | G2                 | -                        | MIBC                |
| 5                     | Male          | 62         | T3                 | G3                 | +                        | MIBC                |
| 6                     | Male          | 72         | T1                 | G3                 | -                        | NMIBC               |
| 7                     | Male          | 64         | T3                 | G3                 | +                        | MIBC                |
| 8                     | Male          | 66         | T1                 | G1                 | -                        | NMIBC               |
| 9                     | Male          | 52         | T4                 | G2                 | +                        | MIBC                |
| 10                    | Male          | 54         | T2                 | G1                 | -                        | MIBC                |
| 11                    | Male          | 52         | T1                 | G3                 | -                        | NMIBC               |
| 12                    | Male          | 73         | T3                 | G2                 | -                        | MIBC                |
| 13                    | Female        | 63         | T1                 | G3                 | -                        | NMIBC               |
| 14                    | Male          | 61         | T2                 | G1                 | -                        | MIBC                |
| 15                    | Female        | 68         | T3                 | G3                 | +                        | MIBC                |
| 16                    | Male          | 56         | T2                 | G1                 | -                        | MIBC                |
| 17                    | Male          | 48         | T2                 | G2                 | -                        | MIBC                |
| 18                    | Male          | 61         | T3                 | G2                 | -                        | MIBC                |
| 19                    | Male          | 64         | T1                 | G1                 | -                        | NMIBC               |
| 20                    | Male          | 70         | T2                 | G2                 | -                        | MIBC                |
| 21                    | Male          | 26         | T2                 | G1                 | -                        | MIBC                |
| 22                    | Male          | 51         | T2                 | G2                 | -                        | MIBC                |
| 23                    | Male          | 56         | T3                 | G1                 | -                        | MIBC                |
| 24                    | Female        | 69         | T2                 | G1                 | -                        | MIBC                |
| 25                    | Male          | 67         | T1                 | G3                 | -                        | NMIBC               |
| 26                    | Male          | 76         | T2                 | G1                 | -                        | MIBC                |
| 27                    | Male          | 79         | T3                 | G3                 | +                        | MIBC                |
| 28                    | Male          | 62         | T2                 | G1                 | -                        | MIBC                |
| 29                    | Male          | 58         | T1                 | G2                 | -                        | NMIBC               |
| 30                    | Male          | 66         | T2                 | G1                 | -                        | MIBC                |
| 31                    | Female        | 71         | T2                 | G3                 | -                        | MIBC                |

**Supplementary Table S5. Pathways associated with MELK expression in bladder cancer.**

| <b>Gene set</b>                         | <b>ES</b> | <b>NES</b> | <b>NOM p-val</b> | <b>FDR q-val</b> |
|-----------------------------------------|-----------|------------|------------------|------------------|
| Cell cycle                              | 0.7386    | 1.6625     | 0.0000           | 0.0981           |
| Oocyte meiosis                          | 0.6408    | 1.6858     | 0.0000           | 0.2064           |
| DNA replication                         | 0.8222    | 1.5854     | 0.0000           | 0.1212           |
| Proteasome                              | 0.7833    | 1.6766     | 0.0000           | 0.1226           |
| Progesterone mediated oocyte maturation | 0.5771    | 1.6556     | 0.0000           | 0.0793           |
| N-glycan biosynthesis                   | 0.6701    | 1.5876     | 0.0078           | 0.1371           |
| Spliceosome                             | 0.6339    | 1.5802     | 0.0098           | 0.1128           |
| Homologous recombination                | 0.7459    | 1.6250     | 0.0117           | 0.1006           |
| Mismatch repair                         | 0.7549    | 1.5053     | 0.0165           | 0.2019           |
| Cysteine and methionine metabolism      | 0.5743    | 1.5321     | 0.0252           | 0.1920           |
| Selenoamino acid metabolism             | 0.5880    | 1.4678     | 0.0257           | 0.2011           |
| Vibrio cholerae infection               | 0.6048    | 1.5197     | 0.0304           | 0.2040           |
| Terpenoid backbone biosynthesis         | 0.7344    | 1.5007     | 0.0313           | 0.1963           |
| Steroid biosynthesis                    | 0.7537    | 1.5178     | 0.0318           | 0.1894           |
| Nucleotide excision repair              | 0.6155    | 1.4900     | 0.0359           | 0.2060           |
| Biosynthesis of unsaturated fatty acids | 0.7336    | 1.4769     | 0.0373           | 0.2075           |
| RNA degradation                         | 0.5759    | 1.4699     | 0.0405           | 0.2092           |
| Protein export                          | 0.7036    | 1.4809     | 0.0408           | 0.2126           |
| Pyrimidine metabolism                   | 0.5478    | 1.4570     | 0.0426           | 0.2017           |
| Prostate cancer                         | 0.4920    | 1.4105     | 0.0460           | 0.2519           |
| Pentose phosphate pathway               | 0.6858    | 1.4676     | 0.0472           | 0.1908           |



## **Supplementary Information 3**

### **Supplementary material and methods**

#### **Cell proliferation, clonogenic forming and migration assay**

We performed MTT assay to determine cell proliferation. The transfected BCa cells were plated into 96-well plates in 200  $\mu$ l medium to culture for 5 days, and then were added into 20  $\mu$ l MTT solution (5 mg/ml) each well, incubated for 4 h. Microplate reader (Cat. #SpectraMax M2, Molecular Devices, USA) was measured the absorbance at 490m.

In the clonogenic forming assay, the transfected BCa cells were plated in 6-well plates to culture for 2 weeks (1000 cells per well). The cells were fixed with 4% paraformaldehyde for 30 min after washing gently twice by PBS, and then stained with crystal violet. The colonies number was calculated.

The transfected BCa cells were plated in 200  $\mu$ l serumfree medium in the upper transwell chamber (Corning, USA). 600  $\mu$ l medium containing 10% FBS was filled into the lower chamber. After culturing for 24 h, we removed the cells on the upper chamber. The cells on the lower chamber were fixed with 4% paraformaldehyde and stained with crystal violet. The number of stained cells was calculated under an inverted phase contrast microscope and photographed in 3 random fields.

#### **Immunofluorescence staining, Hematoxylin and Eosin (H&E) Staining, Immunohistochemistry (IHC) staining**

We seeded the transfected BCa cells on 12mm coverslips, and fixed the cells with 4%

paraformaldehyde. The Biofavor Biotech Ltd. (Wuhan, China) accomplished the immunofluorescence staining with the fixed BCa cells or tissue samples. We analyzed the immunofluorescence staining with a confocal microscope system (Nikon C2+ Confocal Microscope, Japan).

The mice tumor tissues were stained with Hematoxylin & Eosin. We deparaffinized and continuously rehydrated the sections by xylene, 100 % ethanol, 96 % ethanol, 80 % ethanol, 70 % ethanol and H<sub>2</sub>O, and then stained the sections with 10 % Hematoxylin (Sigma-Aldrich). The cell nuclei were appeared after washing. 1 % Eosin (Sigma-Aldrich) containing 0.2 % glacial acetic acid was used to stain the cytoplasm. The slides were quickly washed and dehydrated in 70 %, 80 %, 96 %, 100 % ethanol and xylene. We used the inverted phase contrast microscope (Cat. #DMI 1, Leica, Wetzlar, Germany) to photograph the sections.

For IHC staining, a proportion of surgical tissue specimens were fixed with formalin to for paraffin-embedded. IHC analyses were performed on 4 μm thick sections. Briefly, each slide was incubated with primary antibody against MELK overnight after a series of procedures (de-paraffin, antigen retrieval, rinse). This was followed by incubation with the anti-rabbit IgG-HRP antibody for 30 min. The membrane was then washed five times with TBST and enriched with the brown color of DAB Enhancer (Dako, China). The MELK expression was evaluated by three experienced pathologists. We used phase contrast microscope to analyze IHC sections.

## Supplementary Information 4

### Related File 1. Ethics Committee Approval (number: 2015029).

| 武汉大学中南医院医学伦理委员会科研项目伦理审批件 |                                                                                                                                                                                                                                                                                                                                                                                                                                            |               |                    |
|--------------------------|--------------------------------------------------------------------------------------------------------------------------------------------------------------------------------------------------------------------------------------------------------------------------------------------------------------------------------------------------------------------------------------------------------------------------------------------|---------------|--------------------|
| 科伦[2015029]              |                                                                                                                                                                                                                                                                                                                                                                                                                                            |               |                    |
| 项目名称                     | 泌尿系疾病发病机制及分子诊治的科学研究                                                                                                                                                                                                                                                                                                                                                                                                                        |               |                    |
| 申报单位                     | 武汉大学中南医院                                                                                                                                                                                                                                                                                                                                                                                                                                   |               |                    |
| 项目负责人                    | 王行环                                                                                                                                                                                                                                                                                                                                                                                                                                        | 科室            | 泌尿外科               |
| 课题来源                     | 武汉市科技局                                                                                                                                                                                                                                                                                                                                                                                                                                     |               |                    |
| 审查文件                     | 详见附件                                                                                                                                                                                                                                                                                                                                                                                                                                       |               |                    |
| 审查类别                     | 初始审查                                                                                                                                                                                                                                                                                                                                                                                                                                       | 审查方式          | 会议审查               |
| 审查日期                     | 2015-07-29                                                                                                                                                                                                                                                                                                                                                                                                                                 | 审查地点          | 中南医院门诊 13 楼 2 号会议室 |
| 出席人员                     | 实到 10 人                                                                                                                                                                                                                                                                                                                                                                                                                                    | 回避 0 人        | 弃权 0 人             |
| 投票结果                     | 同意 3 票                                                                                                                                                                                                                                                                                                                                                                                                                                     | 作必要的修正后同意 7 票 | 作必要的修正后重审 0 票      |
|                          |                                                                                                                                                                                                                                                                                                                                                                                                                                            | 不同意 0 票       | 暂停或终止已经批准的试验 0 票   |
| 审查意见                     | 经本伦理委员会审查, 审查决定如下:<br><input type="checkbox"/> 同意 <input checked="" type="checkbox"/> 作必要的修正后同意 <input type="checkbox"/> 作必要的修正后重审<br><input type="checkbox"/> 不同意 <input type="checkbox"/> 终止或暂停已批准的试验<br><br>主任委员或副主任委员签字: <br>武汉大学中南医院医学伦理委员会 (盖章): <br>日期: 2015.7.31 |               |                    |
| 注意事项:                    | 1. 请遵循 CFDA/GCP 原则和《赫尔辛基宣言》, 遵循本伦理委员会批准的方案开展临床研究, 保护受试者的健康与权利。<br>2. 研究过程中, 对研究方案和知情同意书等相关文件的修改, 均须得到伦理委员会审查同意后实施。<br>3. 发生严重不良事件或影响研究风险受益比的非预期不良事件, 违背方案、暂停/提前终止研究须及时报告本伦理委员会。<br>4. 根据项目来源类别提交跟踪审查材料。<br>伦理委员会声明: 本伦理委员会严格按照中国 GCP 及相关法律法规组成及工作。<br>伦理委员会地址: 湖北省武汉市武昌区东湖路 169 号; 邮编 430071; 电话: 027-67812787。                                                                                                                            |               |                    |

| 复 审 表           |                                                                                                                                                                                                                                                                                                                    |
|-----------------|--------------------------------------------------------------------------------------------------------------------------------------------------------------------------------------------------------------------------------------------------------------------------------------------------------------------|
| 项 目             | 泌尿系疾病发病机制及分子诊治的科学研究                                                                                                                                                                                                                                                                                                |
| 申办者             |                                                                                                                                                                                                                                                                                                                    |
| 方案版本号           | 方案版本日期                                                                                                                                                                                                                                                                                                             |
| 知情同意书版本号        | 知情同意书版本日期                                                                                                                                                                                                                                                                                                          |
| 研究专业/PI         | 王行环/泌尿外科                                                                                                                                                                                                                                                                                                           |
| 审查意见:           | 1. 所做修改是否符合上次审查意见<br><input checked="" type="checkbox"/> 是 <input type="checkbox"/> 否<br>2. 是否需要进一步修正<br><input type="checkbox"/> 是 <input checked="" type="checkbox"/> 否<br>3. 是否提交会议审查<br><input type="checkbox"/> 是 <input checked="" type="checkbox"/> 否                                                       |
| 主审委员审查意见        | <input checked="" type="checkbox"/> 同意 <input type="checkbox"/> 作必要的修正后同意 <input type="checkbox"/> 作必要的修正后重审<br><input type="checkbox"/> 不同意 <input type="checkbox"/> 终止或暂停已批准的试验<br>建议: _____<br>_____<br>主审委员签名:  日期: 2016.2.3 |
| 医学伦理委员会评审结果:    | <input checked="" type="checkbox"/> 同意 <input type="checkbox"/> 作必要的修正后同意 <input type="checkbox"/> 作必要的修正后重审<br><input type="checkbox"/> 不同意 <input type="checkbox"/> 终止或暂停已批准的试验                                                                                                                                  |
| 主任委员或副主任委员签名/日期 |  2016.2.3                                                                                                                                                                                                                       |

**Approval by the Ethics Committee at Zhongnan Hospital of Wuhan University for the microarray and RT-PCR analysis using RNA isolated from human bladder cancer tissues and normal bladder tissues from donors by accidental death.**
